# Supplementary material for: Longitudinal analyses of CLL in mice identify leukemia-related clonal changes including a Myc gain predicting poor outcome in patients
Source: PubMed Central journal article supplement (PMC8807396; doi:10.1038/s41375-021-01381-4), 2021-08-20

Supp. Fig. 1

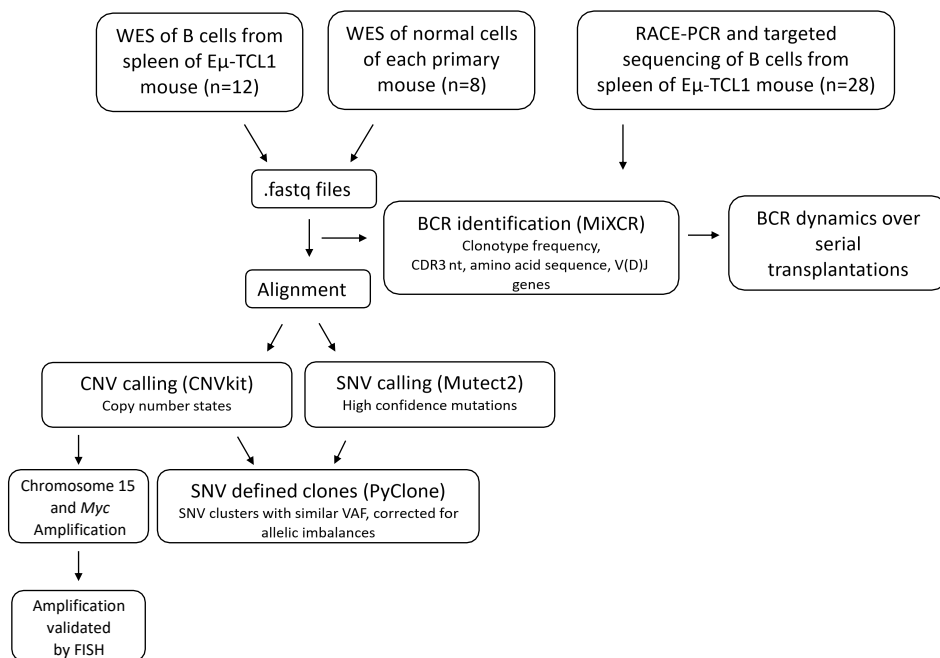

Supplement: 41375_2021_1381_MOESM3_ESM.pdf [file 41375_2021_1381_MOESM3_ESM.pdf]
