# Supplementary material for: Longitudinal analyses of CLL in mice identify leukemia-related clonal changes including a Myc gain predicting poor outcome in patients
Source: PubMed Central journal article supplement (PMC8807396; doi:10.1038/s41375-021-01381-4), 2021-08-20

# Supp. Fig. 3

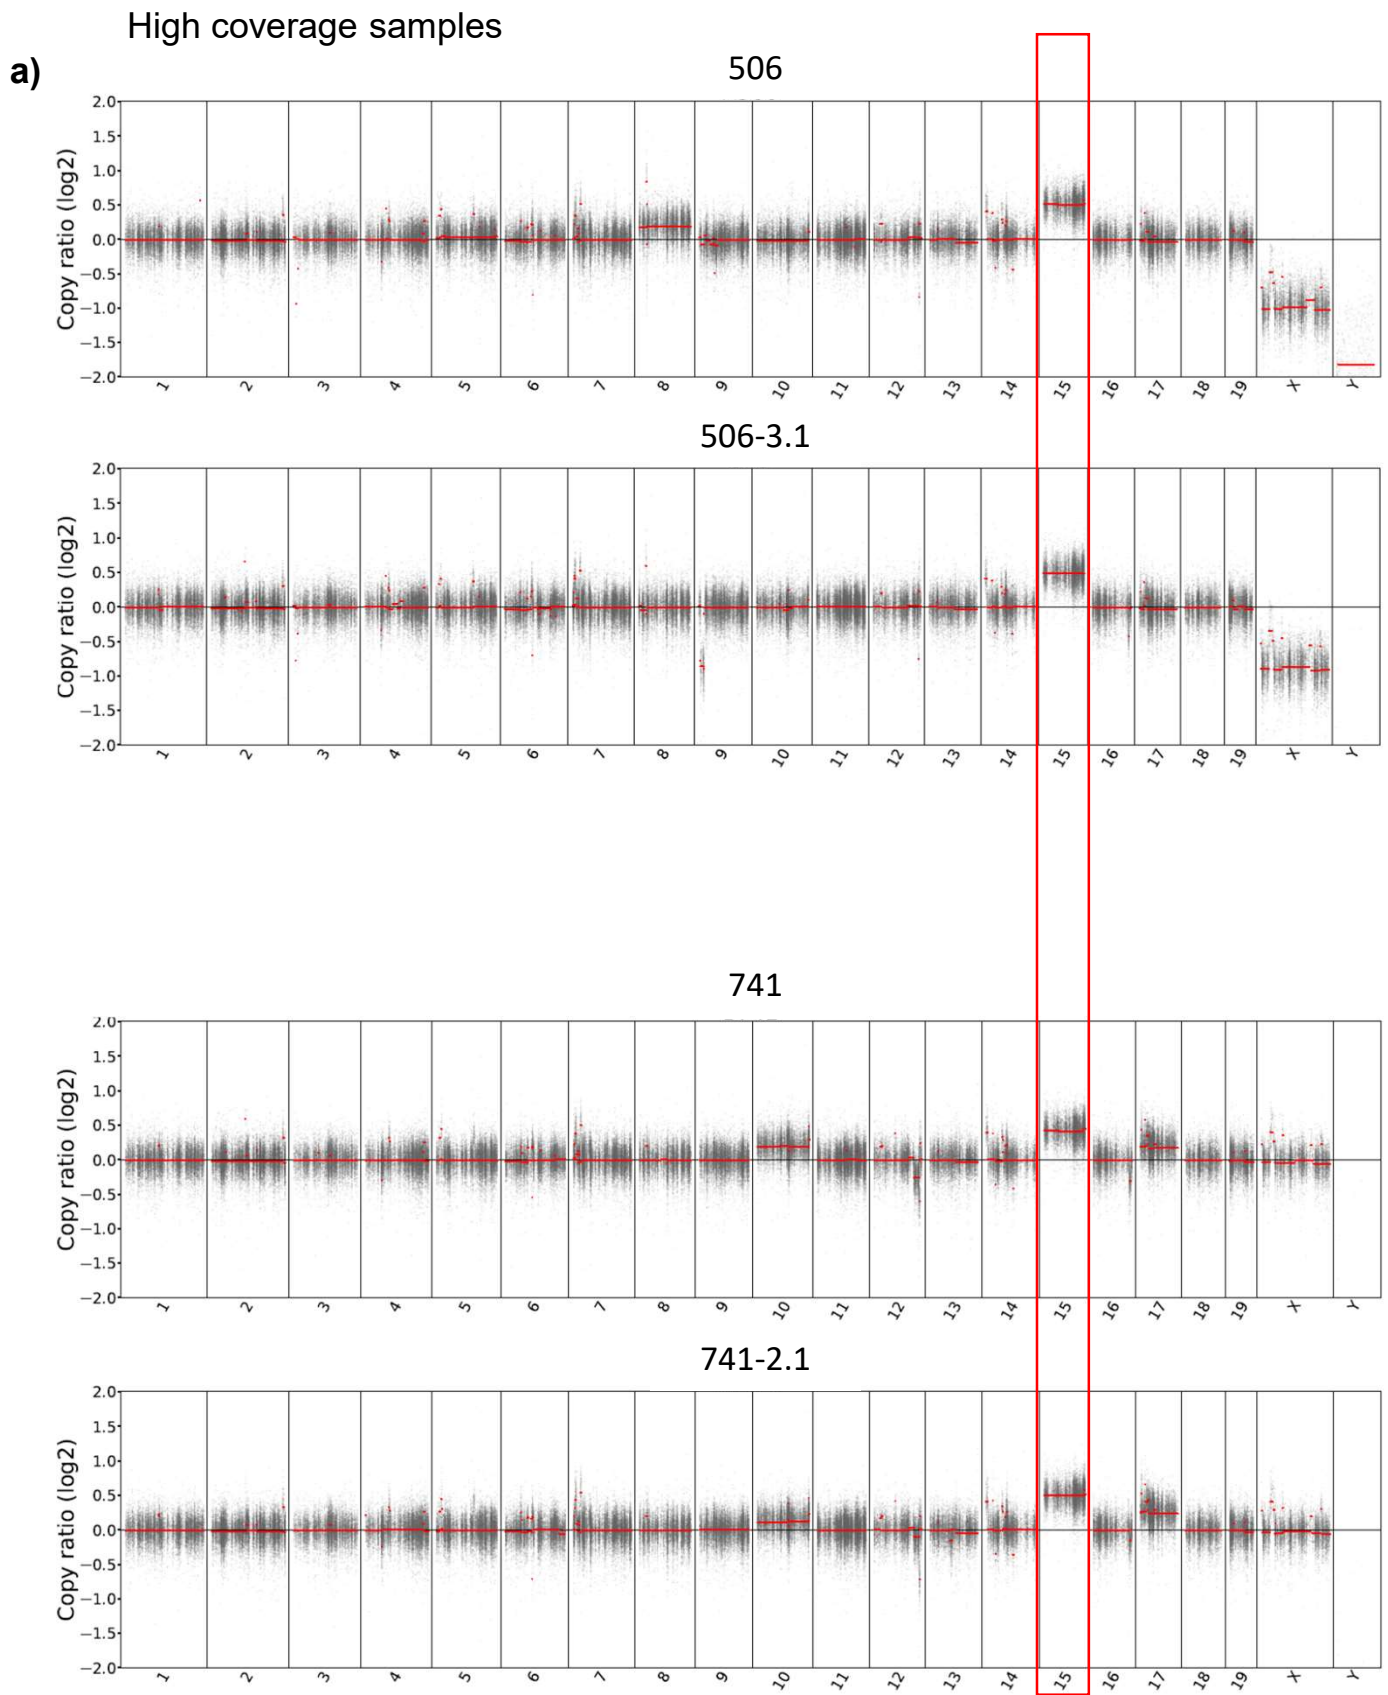

# Supp. Fig. 3

High coverage samples  
a) (continued)

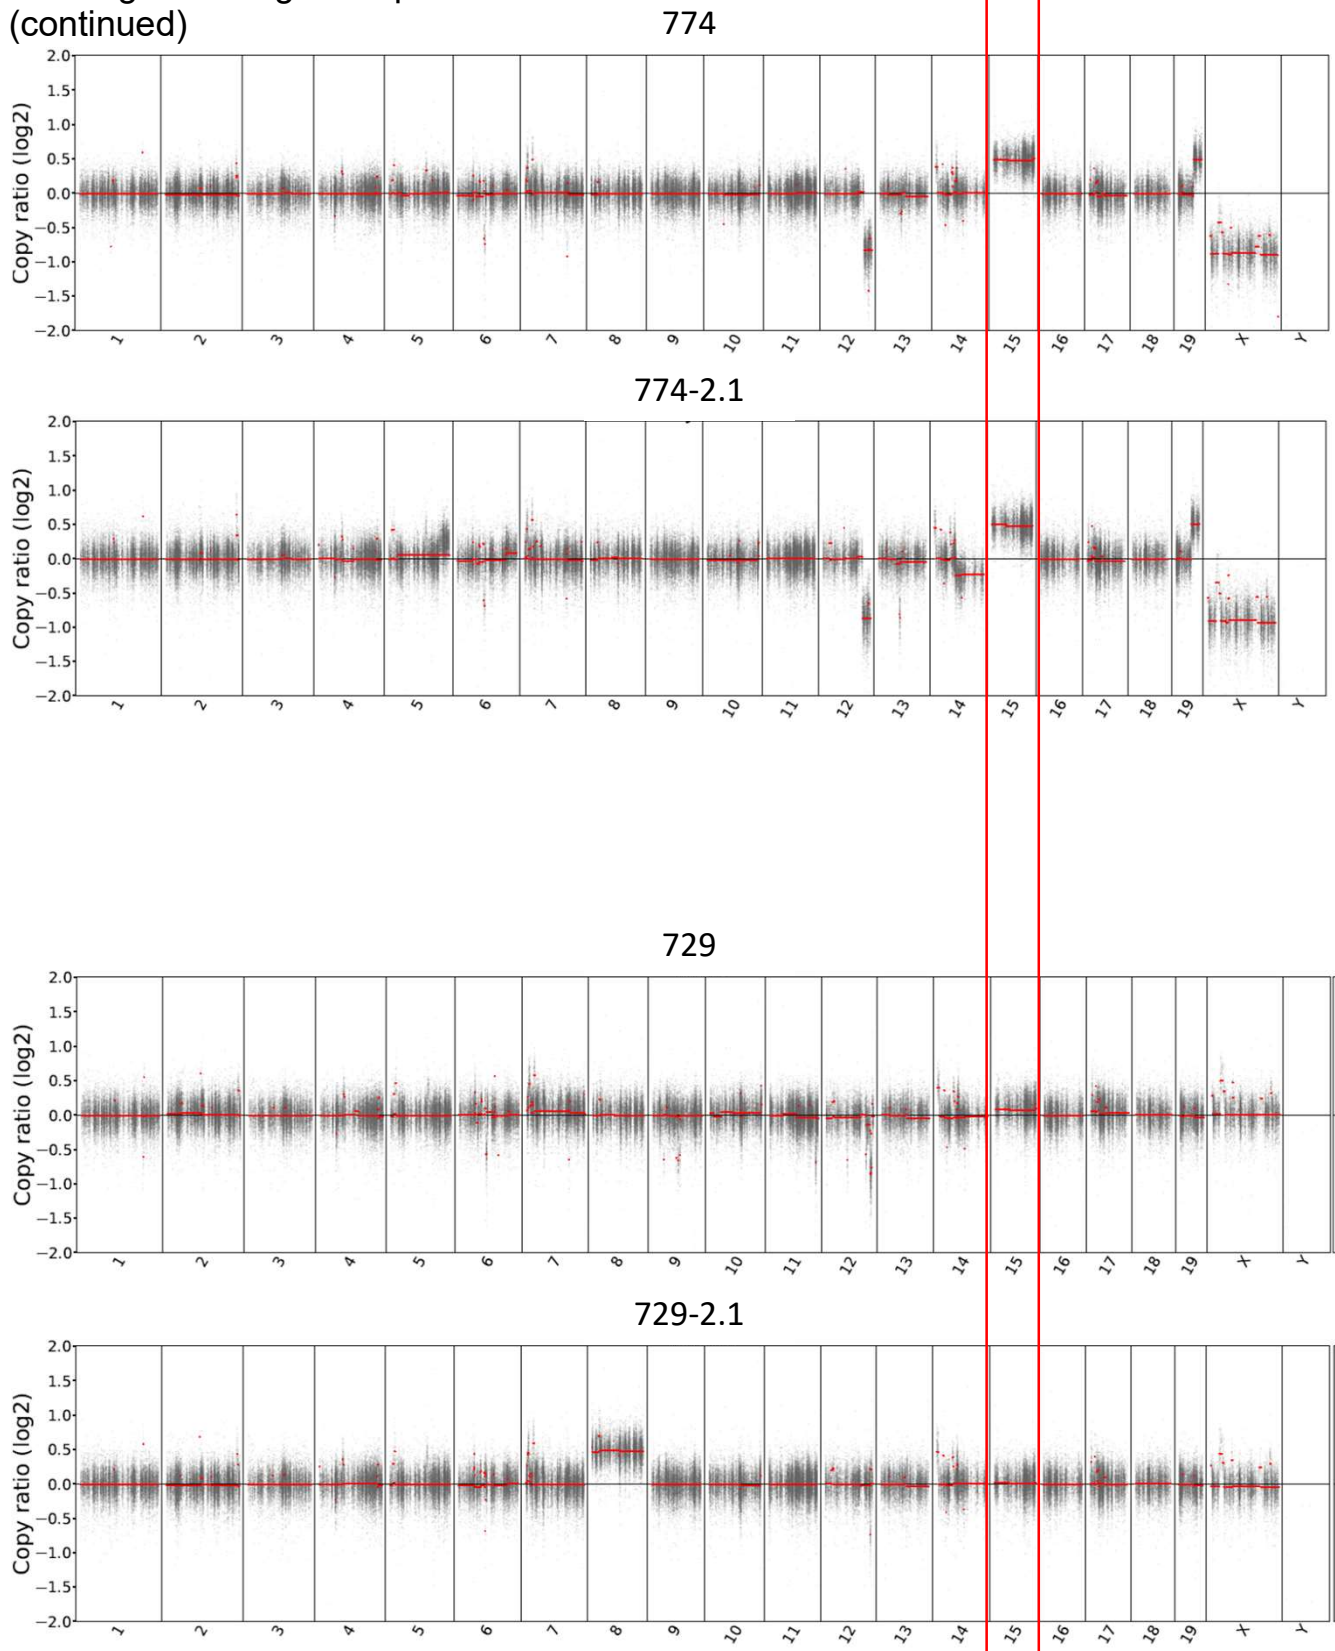

# Supp. Fig. 3

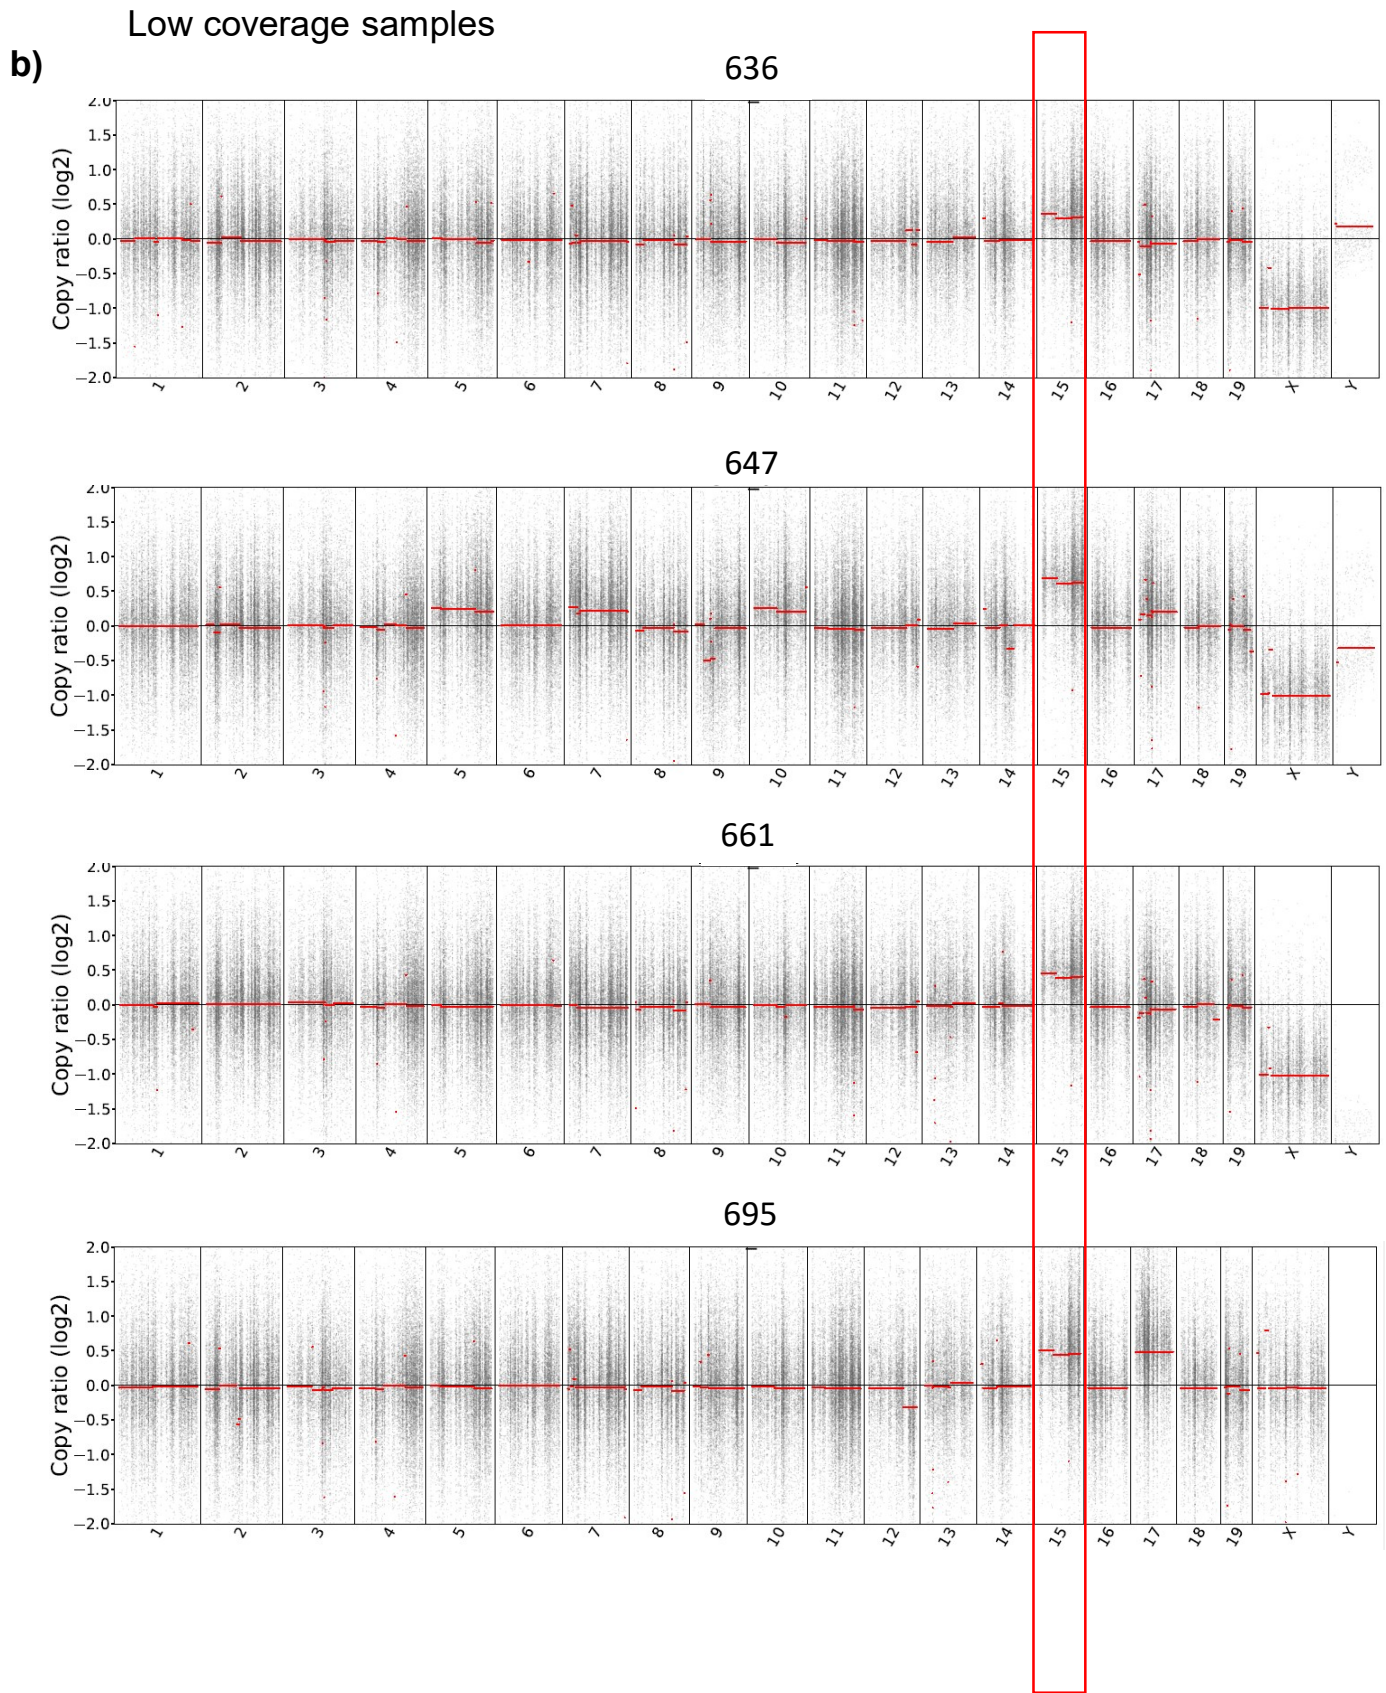

# Supp. Fig. 3

SRP150049 primary samples

c)

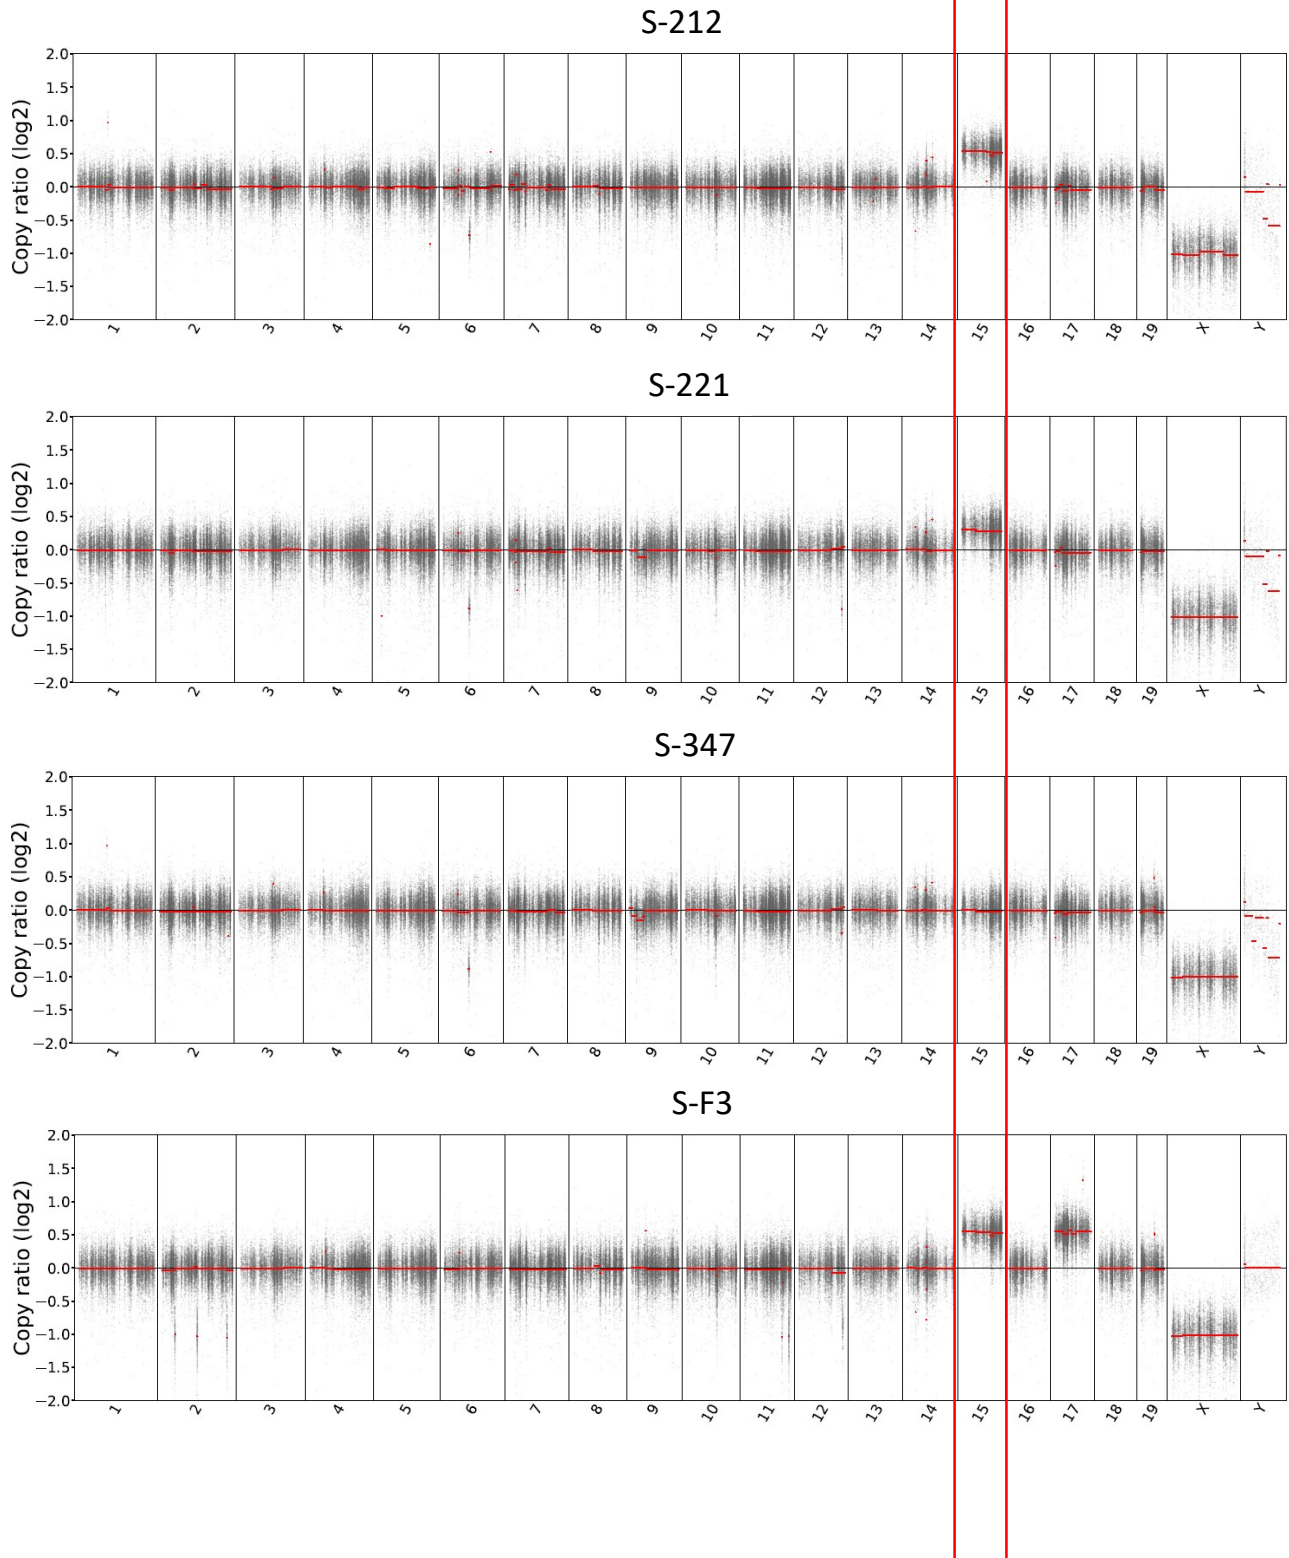

# Supp. Fig. 3

SRP150049 primary and transferred samples

d)

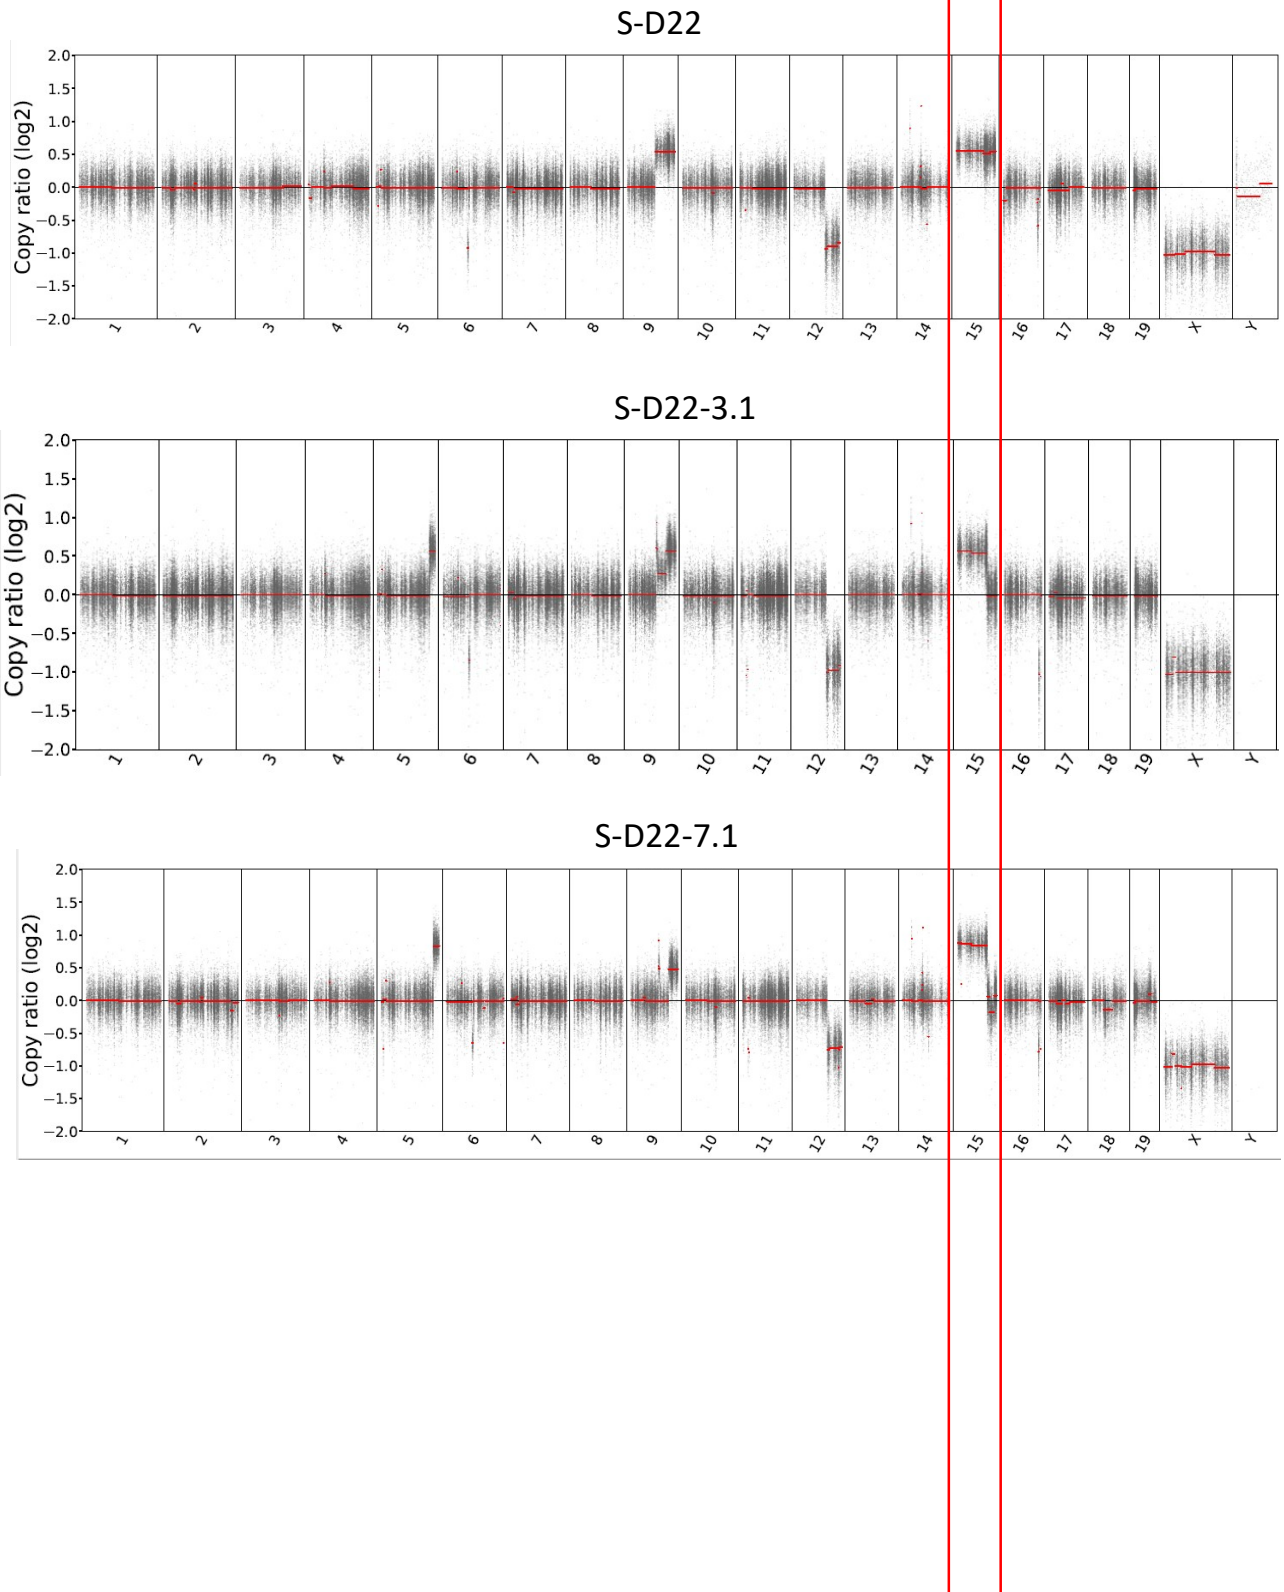

# Supp. Fig. 3

SRP150049 primary and transferred samples  
d) (continued)

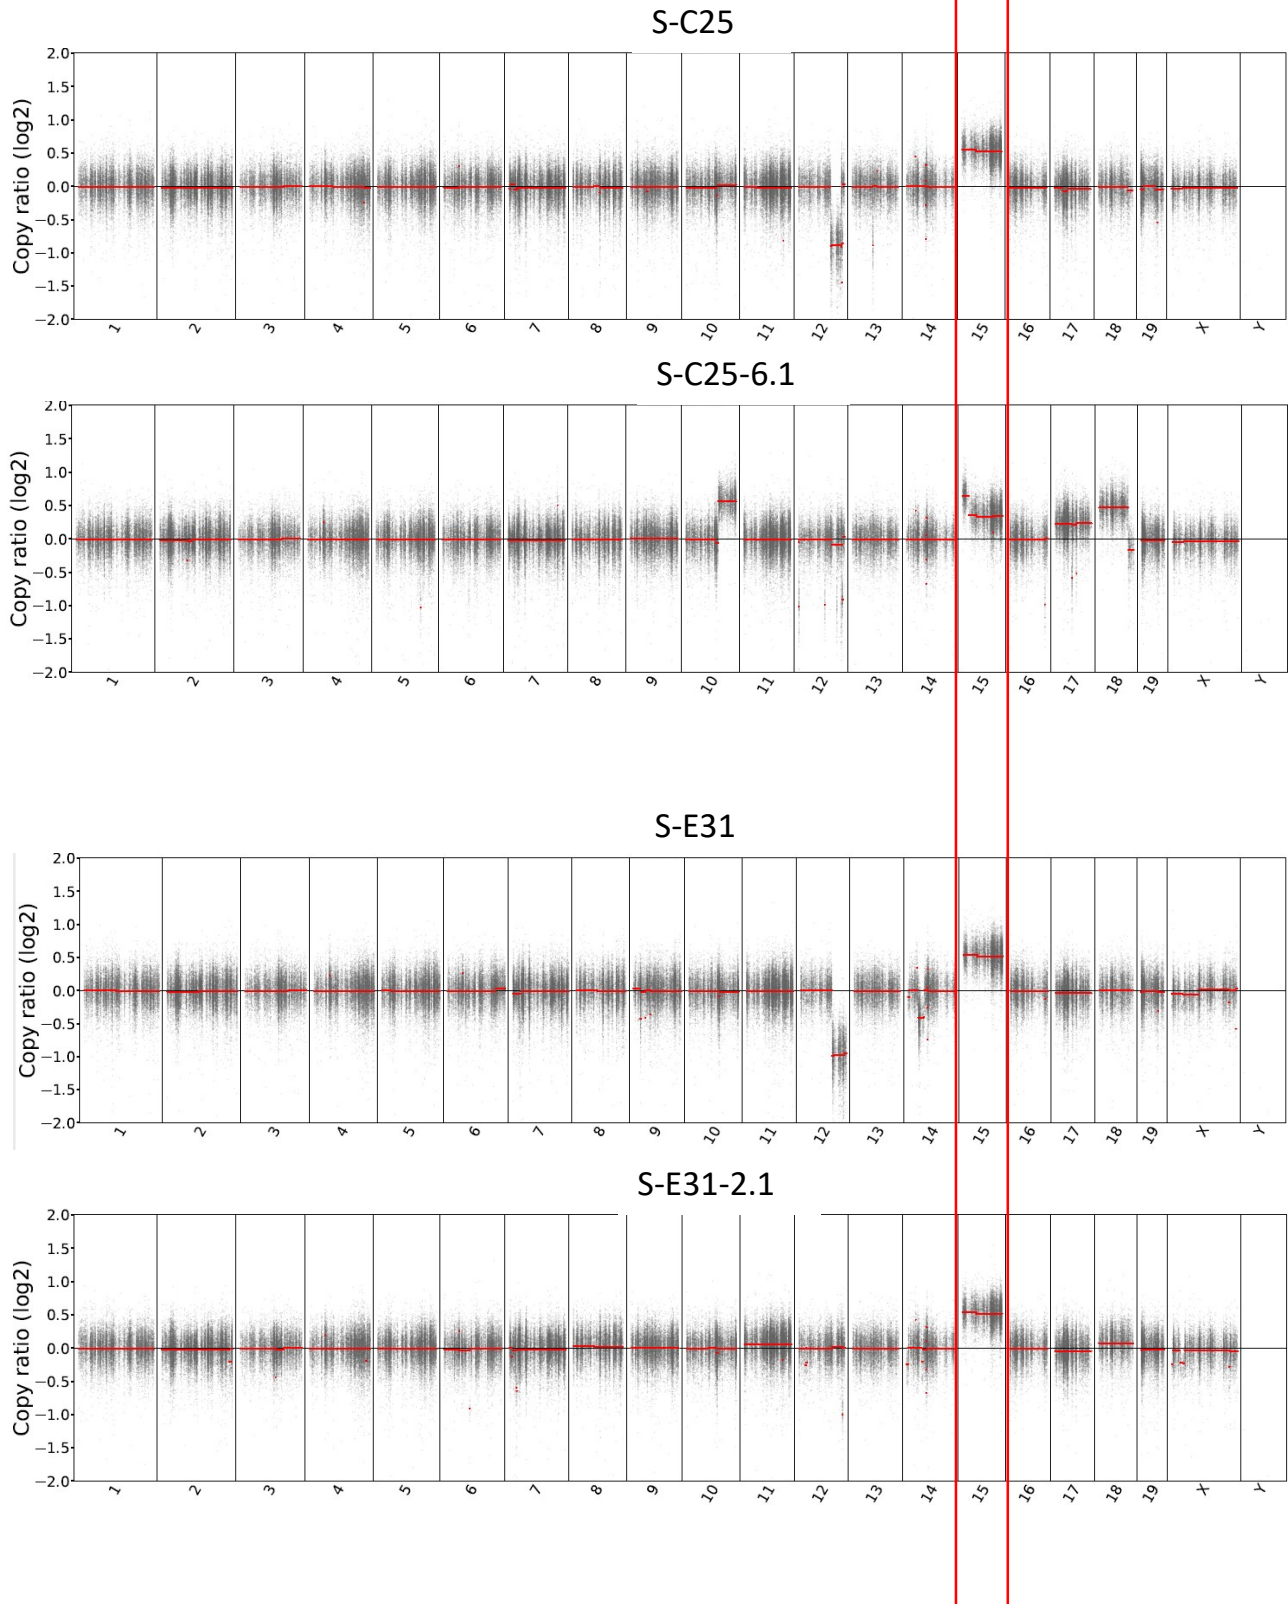

Supplement: 41375_2021_1381_MOESM5_ESM.pdf [file 41375_2021_1381_MOESM5_ESM.pdf]
